# Supplementary material for: Two-dimensional RuO2 nanosheets as robust catalysts for peroxymonosulfate activation
Source: Royal Society of Chemistry journal article supplement (doi:10.1039/c9en00500e), 2019-01-01
Supplement: c9en00500e1.pdf [file c9en00500e1.pdf]

## Supplementary information

# **RuO<sub>2</sub> Two-Dimensional Nanosheets as Robust Catalyst for Peroxymonosulfate Activation**

Jonghun Lim,<sup>a</sup> Jang Mee Lee,<sup>b</sup> Chuhyung Kim,<sup>a</sup> Seong-Ju Hwang,<sup>b</sup> Jaesang Lee,<sup>c\*</sup> and  
Wonyong Choi<sup>a\*</sup>

<sup>a</sup> Division of Environmental Science and Engineering and Department of Chemical Engineering, Pohang University of Science and Technology (POSTECH), Pohang 37673, Korea

<sup>b</sup> Center for Hybrid Interfacial Chemical Structure (CICS), Department of Chemistry and Nanoscience, Ewha Womans University, Seoul 03760, Korea

<sup>c</sup> School of Civil, Environmental, and Architectural Engineering, Korea University, Seoul 136-701, Korea.

\*Corresponding author.

E-mail: [wchoi@postech.edu](mailto:wchoi@postech.edu) (W. C.); Phone: +82-54-279-2283

E-mail: [lee39@korea.ac.kr](mailto:lee39@korea.ac.kr) (J. L.); Phone: +82-2-3290-4864

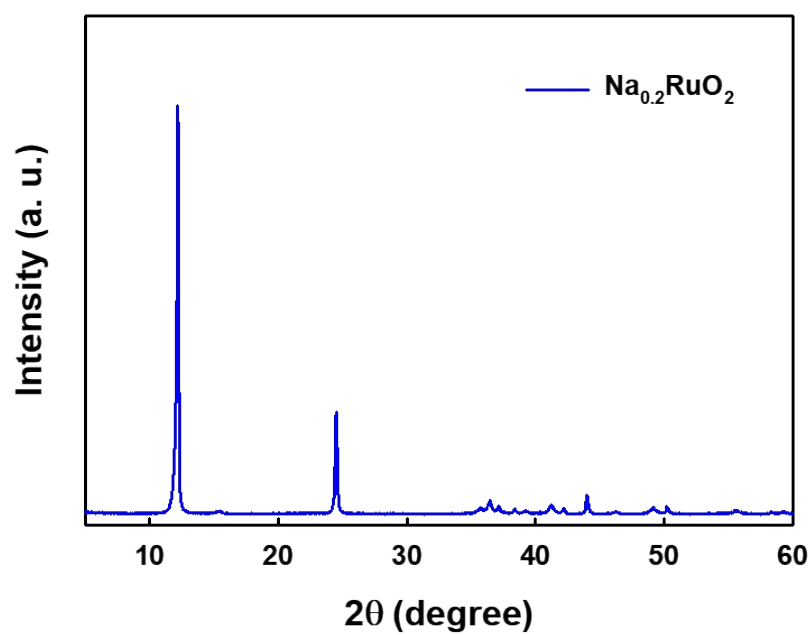

**Fig. S1.** XRD patterns of  $\text{Na}_{0.2}\text{RuO}_2$ .

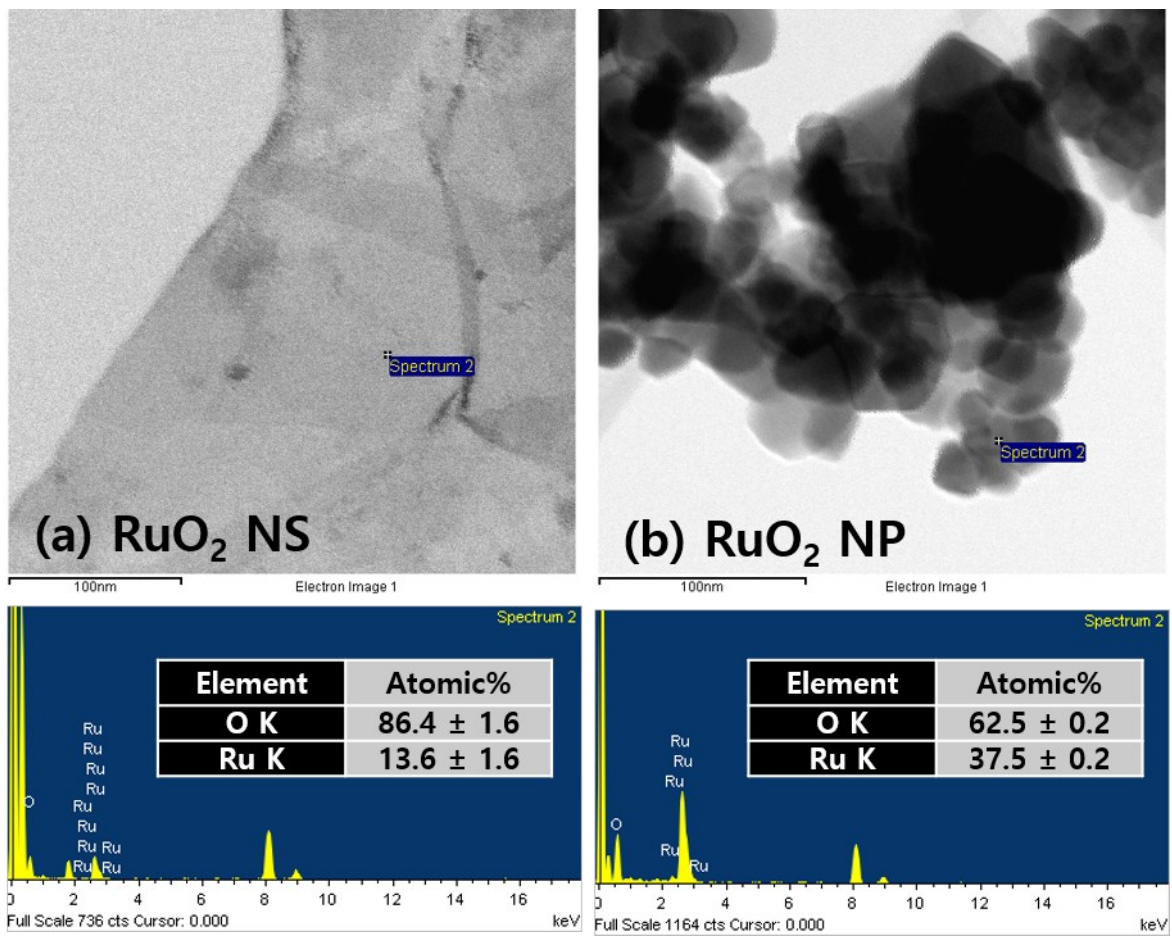

**Fig. S2.** TEM image and EDX analysis of (a) RuO<sub>2</sub> NS and (b) RuO<sub>2</sub> NP.

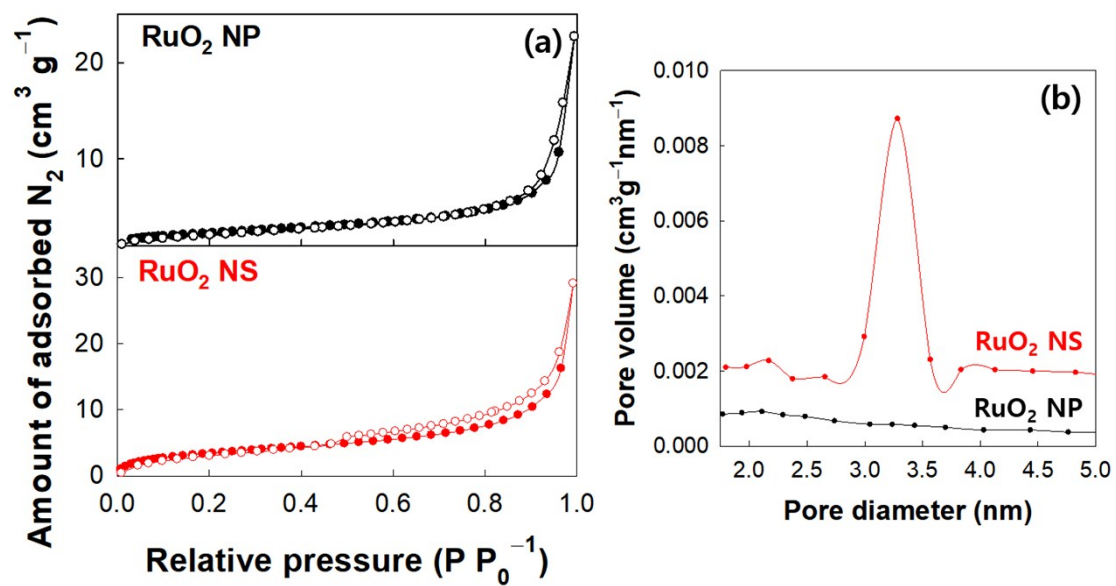

**Fig. S3.** (a)  $N_2$  adsorption-desorption isotherms and (b) pore size distribution of  $RuO_2$  NP and  $RuO_2$  NS.

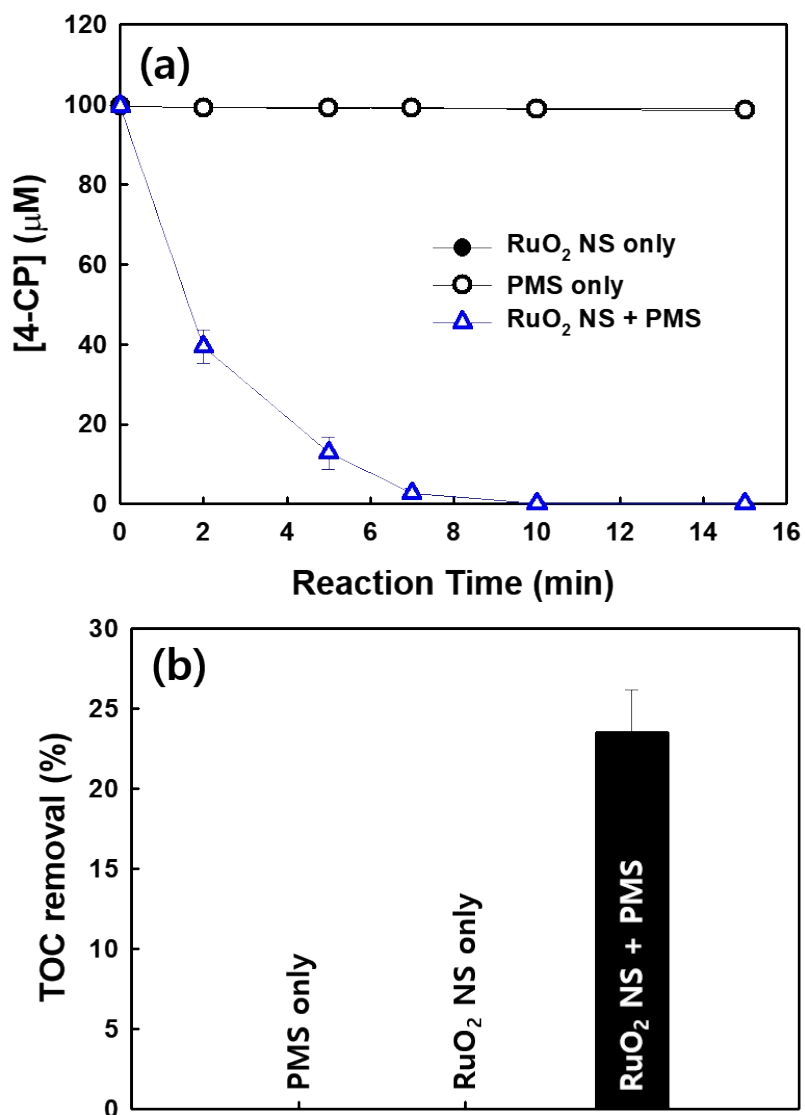

**Fig. S4.** (a) 4-CP degradation and (b) TOC removal in the presence of PMS and/or RuO<sub>2</sub> NS ( $[\text{cat.}]_0 = 0.125 \text{ g/L}$ ;  $[\text{4-CP}]_0 = 100 \text{ }\mu\text{M}$ ;  $[\text{PMS}]_0 = 1 \text{ mM}$ ;  $[\text{Phosphate buffer}]_0 = 10 \text{ mM}$ ;  $\text{pH}_i = 7.0$ ).

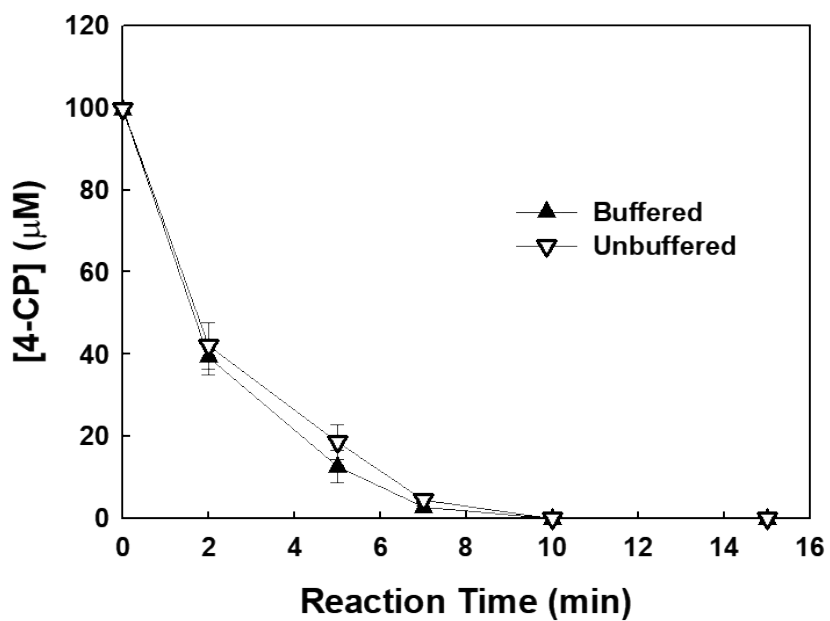

**Fig. S5.** 4-CP degradation in  $\text{RuO}_2$  NS/PMS system in buffered and unbuffered solution ( $[\text{cat.}]_0 = 0.125 \text{ g/L}$ ;  $[\text{4-CP}]_0 = 100 \text{ }\mu\text{M}$ ;  $[\text{PMS}]_0 = 1 \text{ mM}$ ;  $[\text{Phosphate buffer}]_0 = 10 \text{ mM}$  (for buffered solution);  $\text{pH}_i = 7.0$ ).

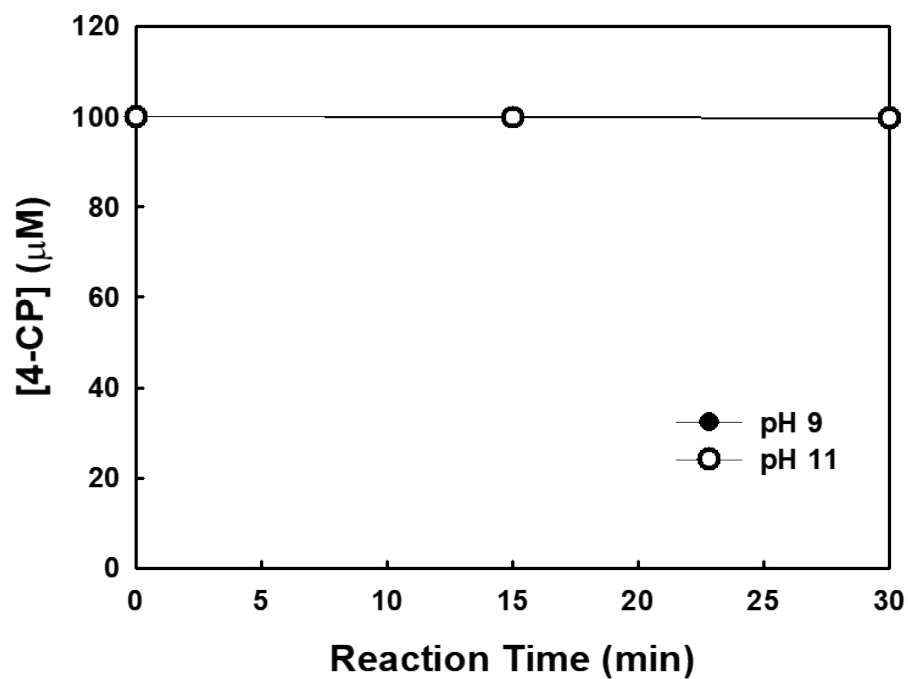

**Fig. S6.** 4-CP degradation in the absence of RuO<sub>2</sub> NS ([4-CP]<sub>0</sub> = 100 μM; [PMS]<sub>0</sub> = 1 mM; pH<sub>i</sub> = 9.0 and 11.0).

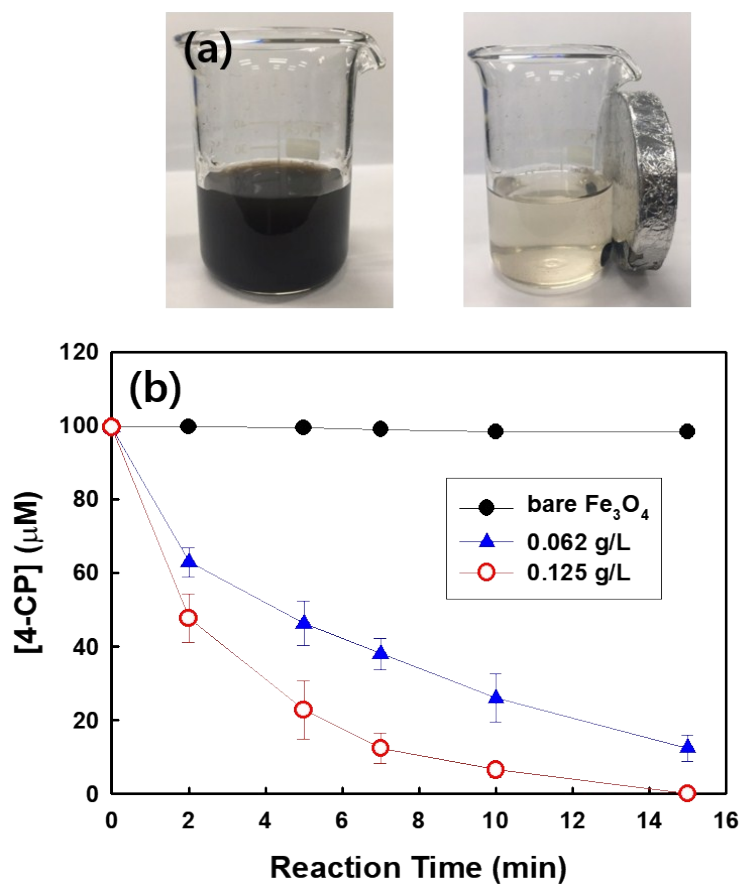

**Fig. S7.** (a) Photo images of aqueous dispersion of RuO<sub>2</sub> NS/Fe<sub>3</sub>O<sub>4</sub> (left) and the recovery of catalysts using a magnet (right). (b) 4-CP degradation by RuO<sub>2</sub> NS/Fe<sub>3</sub>O<sub>4</sub>. ([4-CP]<sub>0</sub> = 100 μM; [PMS]<sub>0</sub> = 1 mM; [Phosphate buffer]<sub>0</sub> = 10 mM; pH<sub>i</sub> = 7.0).
